# Supplementary material
Source: PubMed Central journal article supplement (PMC9186421)
Supplement: NIHMS1804262-supplement-3.pdf [file NIHMS1804262-supplement-3.pdf]

## Reporting Summary

Nature Portfolio wishes to improve the reproducibility of the work that we publish. This form provides structure for consistency and transparency in reporting. For further information on Nature Portfolio policies, see our [Editorial Policies](#) and the [Editorial Policy Checklist](#).

### Statistics

For all statistical analyses, confirm that the following items are present in the figure legend, table legend, main text, or Methods section.

n/a Confirmed

- |                                     |                                     |                                                                                                                                                                                                                                                            |
|-------------------------------------|-------------------------------------|------------------------------------------------------------------------------------------------------------------------------------------------------------------------------------------------------------------------------------------------------------|
| <input type="checkbox"/>            | <input checked="" type="checkbox"/> | The exact sample size ( $n$ ) for each experimental group/condition, given as a discrete number and unit of measurement                                                                                                                                    |
| <input checked="" type="checkbox"/> | <input type="checkbox"/>            | A statement on whether measurements were taken from distinct samples or whether the same sample was measured repeatedly                                                                                                                                    |
| <input type="checkbox"/>            | <input checked="" type="checkbox"/> | The statistical test(s) used AND whether they are one- or two-sided<br><i>Only common tests should be described solely by name; describe more complex techniques in the Methods section.</i>                                                               |
| <input checked="" type="checkbox"/> | <input type="checkbox"/>            | A description of all covariates tested                                                                                                                                                                                                                     |
| <input checked="" type="checkbox"/> | <input type="checkbox"/>            | A description of any assumptions or corrections, such as tests of normality and adjustment for multiple comparisons                                                                                                                                        |
| <input type="checkbox"/>            | <input checked="" type="checkbox"/> | A full description of the statistical parameters including central tendency (e.g. means) or other basic estimates (e.g. regression coefficient) AND variation (e.g. standard deviation) or associated estimates of uncertainty (e.g. confidence intervals) |
| <input checked="" type="checkbox"/> | <input type="checkbox"/>            | For null hypothesis testing, the test statistic (e.g. $F$ , $t$ , $r$ ) with confidence intervals, effect sizes, degrees of freedom and $P$ value noted<br><i>Give <math>P</math> values as exact values whenever suitable.</i>                            |
| <input checked="" type="checkbox"/> | <input type="checkbox"/>            | For Bayesian analysis, information on the choice of priors and Markov chain Monte Carlo settings                                                                                                                                                           |
| <input checked="" type="checkbox"/> | <input type="checkbox"/>            | For hierarchical and complex designs, identification of the appropriate level for tests and full reporting of outcomes                                                                                                                                     |
| <input checked="" type="checkbox"/> | <input type="checkbox"/>            | Estimates of effect sizes (e.g. Cohen's $d$ , Pearson's $r$ ), indicating how they were calculated                                                                                                                                                         |

*Our web collection on [statistics for biologists](#) contains articles on many of the points above.*

### Software and code

Policy information about [availability of computer code](#)

Data collection ImageScope, iTecan, ExpeData, QuantStudio, NanoDrop2000, Imagelab

Data analysis GraphPad Prism v8.0, Microsoft Excel, Fiji with ImageJ, GSEA, SPSS

For manuscripts utilizing custom algorithms or software that are central to the research but not yet described in published literature, software must be made available to editors and reviewers. We strongly encourage code deposition in a community repository (e.g. GitHub). See the Nature Portfolio [guidelines for submitting code & software](#) for further information.

### Data

Policy information about [availability of data](#)

All manuscripts must include a [data availability statement](#). This statement should provide the following information, where applicable:

- Accession codes, unique identifiers, or web links for publicly available datasets
- A description of any restrictions on data availability
- For clinical datasets or third party data, please ensure that the statement adheres to our [policy](#)

The RNAseq datasets generated in this study will be made available in the SRA database repository. Figs 2D, 5E and S2A-E contain data from RNAseq dataset.

### Field-specific reporting

## Life sciences study design

All studies must disclose on these points even when the disclosure is negative.

|                 |                                                                                                                                                                          |
|-----------------|--------------------------------------------------------------------------------------------------------------------------------------------------------------------------|
| Sample size     | No calculation of sample size was performed. Sample size (n) for each experiment is included in the figure legend. Experiments were performed with at least 2 replicates |
| Data exclusions | No data was excluded from the study.                                                                                                                                     |
| Replication     | Experiments in which statistical analysis was not applicable were replicated at least three times. Other experiments were replicated at least once.                      |
| Randomization   | Study was not randomized.                                                                                                                                                |
| Blinding        | Researchers were not blinded. Experimental and control samples were processed together using the same conditions.                                                        |

## Reporting for specific materials, systems and methods

We require information from authors about some types of materials, experimental systems and methods used in many studies. Here, indicate whether each material, system or method listed is relevant to your study. If you are not sure if a list item applies to your research, read the appropriate section before selecting a response.

### Materials & experimental systems

| n/a                                 | Involved in the study                                           |
|-------------------------------------|-----------------------------------------------------------------|
| <input type="checkbox"/>            | <input checked="" type="checkbox"/> Antibodies                  |
| <input type="checkbox"/>            | <input checked="" type="checkbox"/> Eukaryotic cell lines       |
| <input checked="" type="checkbox"/> | <input type="checkbox"/> Palaeontology and archaeology          |
| <input type="checkbox"/>            | <input checked="" type="checkbox"/> Animals and other organisms |
| <input type="checkbox"/>            | <input checked="" type="checkbox"/> Human research participants |
| <input type="checkbox"/>            | <input checked="" type="checkbox"/> Clinical data               |
| <input checked="" type="checkbox"/> | <input type="checkbox"/> Dual use research of concern           |

### Methods

| n/a                                 | Involved in the study                           |
|-------------------------------------|-------------------------------------------------|
| <input checked="" type="checkbox"/> | <input type="checkbox"/> ChIP-seq               |
| <input checked="" type="checkbox"/> | <input type="checkbox"/> Flow cytometry         |
| <input checked="" type="checkbox"/> | <input type="checkbox"/> MRI-based neuroimaging |

## Antibodies

|                 |                                                                                                                                                                                                                                                                                                                                                                                                      |
|-----------------|------------------------------------------------------------------------------------------------------------------------------------------------------------------------------------------------------------------------------------------------------------------------------------------------------------------------------------------------------------------------------------------------------|
| Antibodies used | Cell Signaling: Phospho-p44/42 MAPK (Erk1/2) (Thr202/Tyr204) Antibody (9101), p44/42 MAPK (Erk1/2) (137F5) (4695), pS563 HSL (4139), HSL (4107), pT108/pY182 p38 (9211), p38 (9212), HSP90 (4874s) mGS (3886s) pGS (47043). Turbo-GFP (PA5-22688, Thermofisher), hGP (TA350315, AMSBIO), hGS (22371-1-AP, PROTEINTECH), mGP (19716-1-AP, PROTEINTECH), UCP1 (ab10983, Abcam), DIO2 (ab135711, Abcam) |
| Validation      | Antibodies were used according to the manufacturer instructions                                                                                                                                                                                                                                                                                                                                      |

## Eukaryotic cell lines

Policy information about [cell lines](#)

|                                                                   |                                                                            |
|-------------------------------------------------------------------|----------------------------------------------------------------------------|
| Cell line source(s)                                               | HEK293T cells were purchased from American Type Culture Collection.        |
| Authentication                                                    | HEK293T were validated by American Type Culture Collection                 |
| Mycoplasma contamination                                          | HEK293T cells were tested and found negative for mycoplasma contamination. |
| Commonly misidentified lines (See <a href="#">ICLAC</a> register) | N/A                                                                        |

## Animals and other organisms

Policy information about [studies involving animals](#); [ARRIVE guidelines](#) recommended for reporting animal research

|                         |                                                          |
|-------------------------|----------------------------------------------------------|
| Laboratory animals      | 2-6 months old Male C57Bl/6J mice were used in the study |
| Wild animals            | N/A                                                      |
| Field-collected samples | N/A                                                      |
| Ethics oversight        | University of California - San Diego - IACUC             |

Note that full information on the approval of the study protocol must also be provided in the manuscript.

## Human research participants

---

Policy information about [studies involving human research participants](#)

Population characteristics

All the information about human participants has been previously published and referenced in the manuscript.

Recruitment

All the information about human participants has been previously published and referenced in the manuscript.

Ethics oversight

All the information about human participants has been previously published and referenced in the manuscript.

Note that full information on the approval of the study protocol must also be provided in the manuscript.

## Clinical data

---

Policy information about [clinical studies](#)

All manuscripts should comply with the ICMJE [guidelines for publication of clinical research](#) and a completed [CONSORT checklist](#) must be included with all submissions.

Clinical trial registration

All the information about human participants has been previously published and referenced in the manuscript.

Study protocol

All the information about human participants has been previously published and referenced in the manuscript.

Data collection

All the information about human participants has been previously published and referenced in the manuscript.

Outcomes

All the information about human participants has been previously published and referenced in the manuscript.
