# Supplementary material
Source: PubMed Central journal article supplement (PMC9186421)

---

**Supplementary information**

---

**Glycogen metabolism links glucose homeostasis to thermogenesis in adipocytes**

---

In the format provided by the authors and unedited

Fig 1C

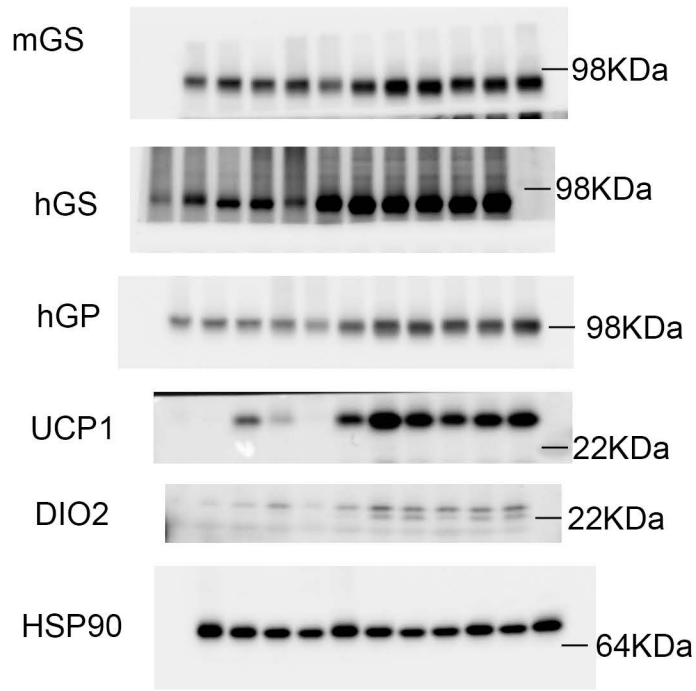

Fig 2F

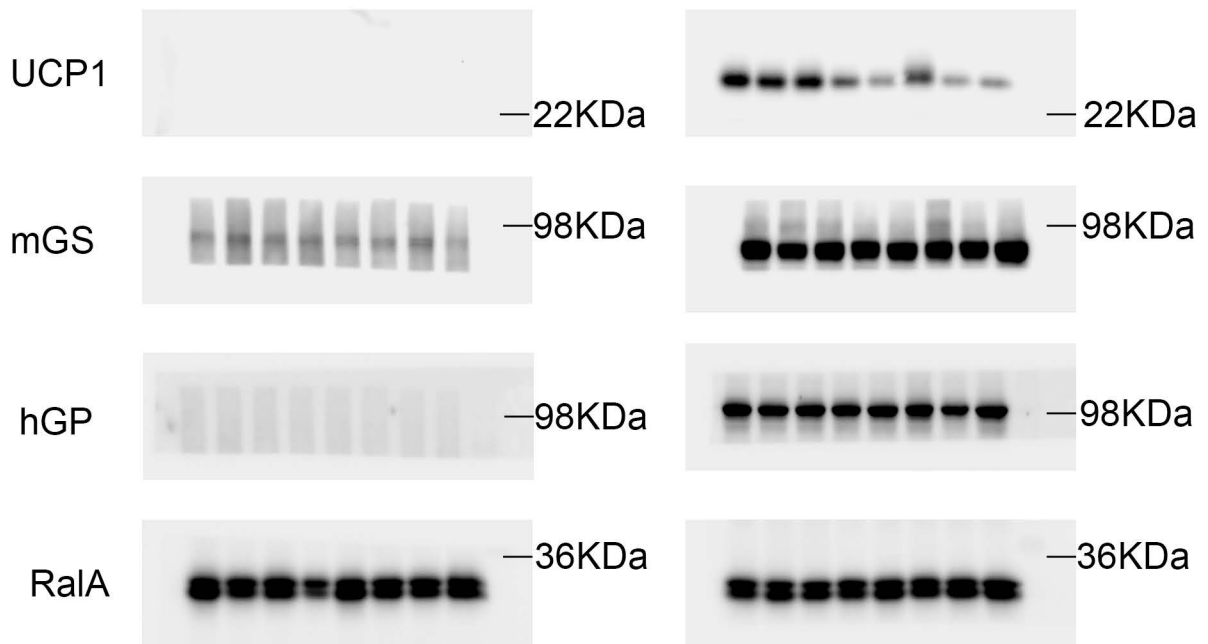

Fig 3A

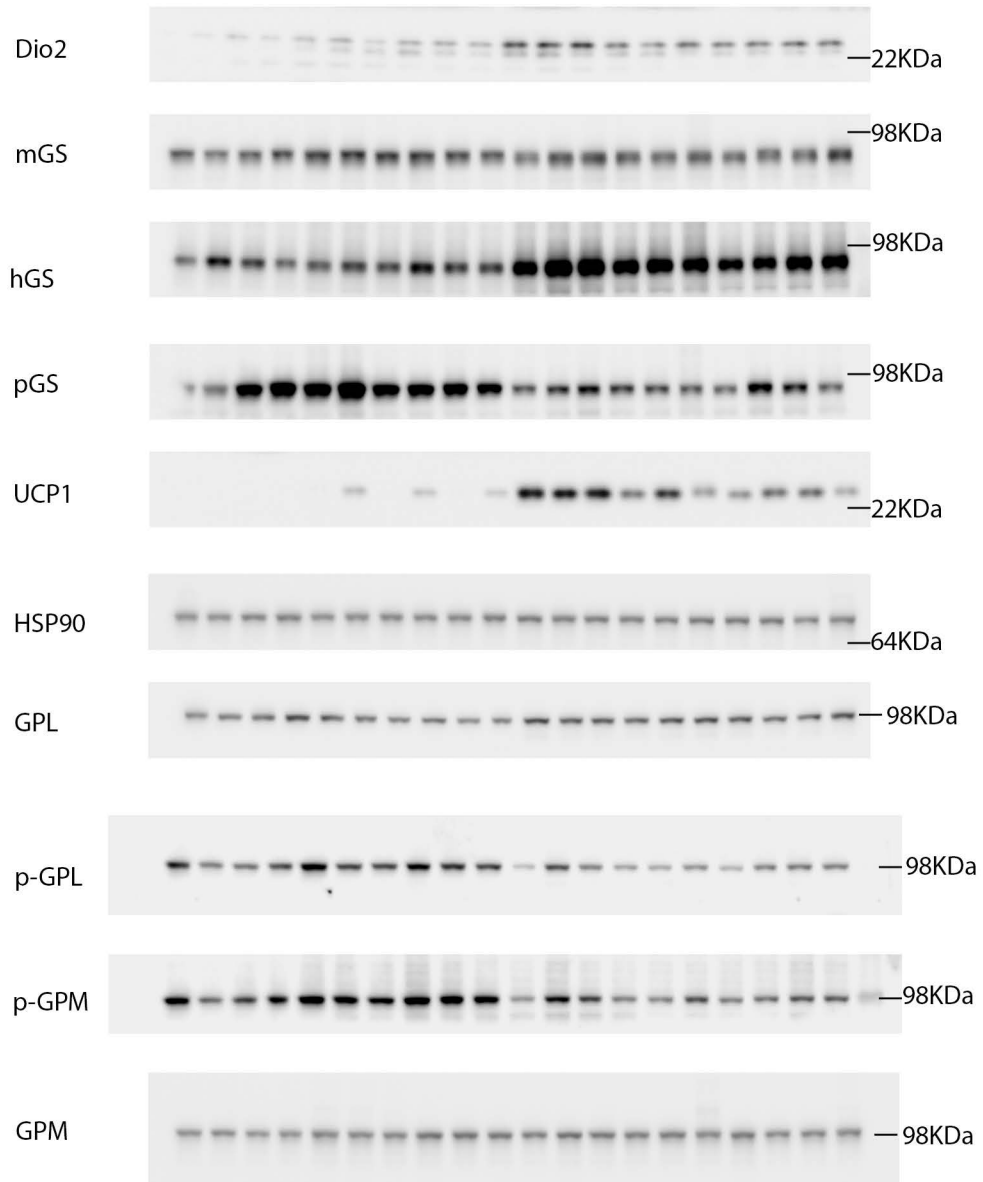

Fig 3E

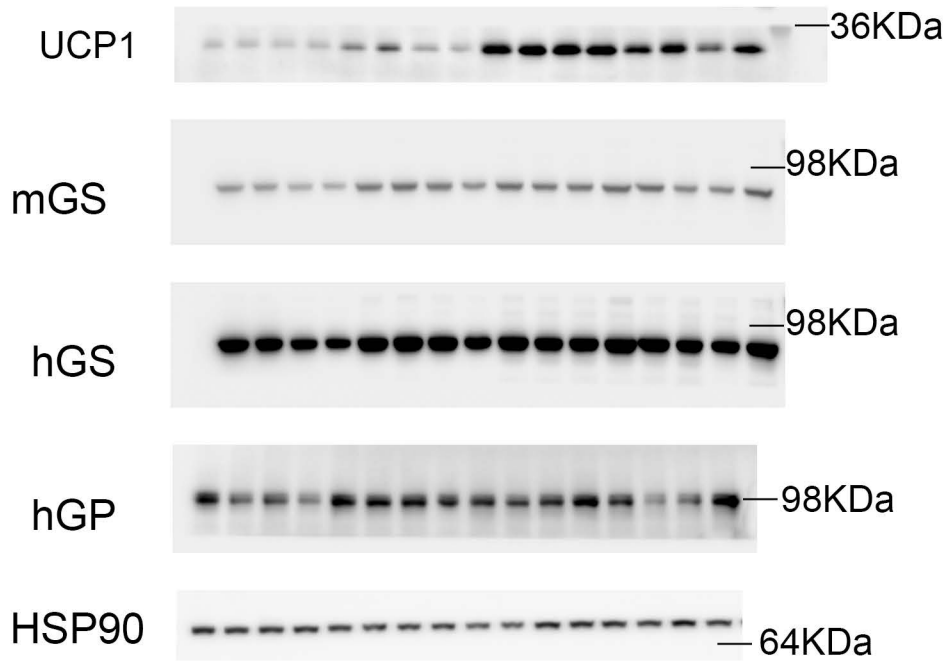

Fig 4E

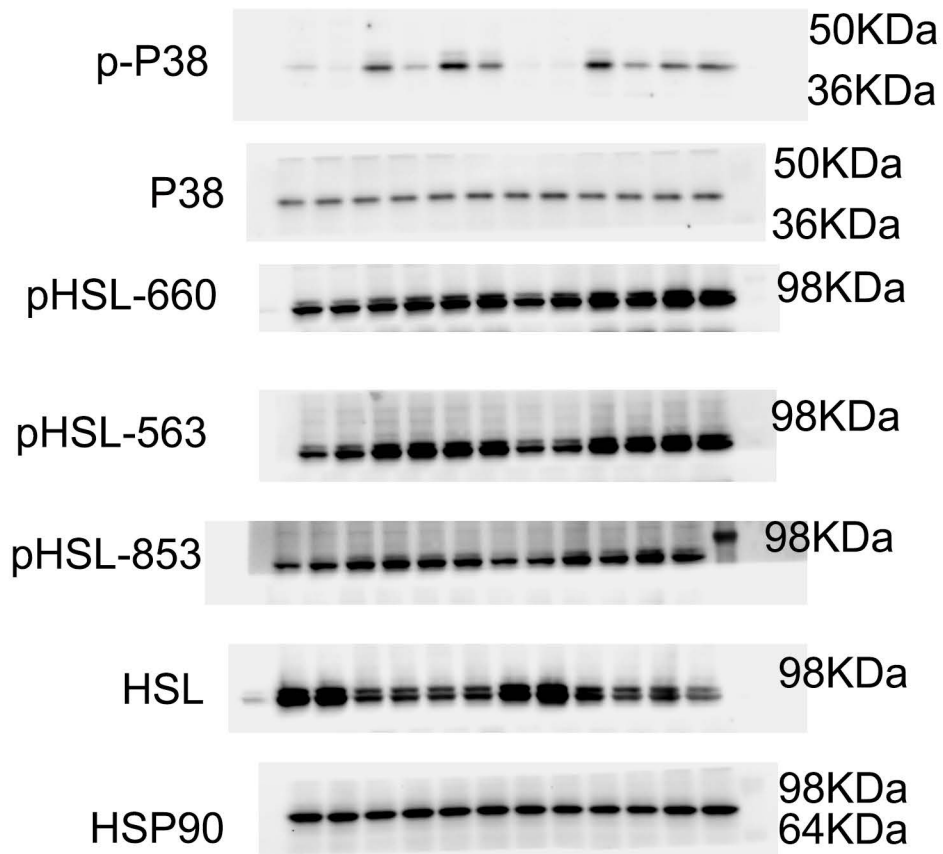

Fig 4E

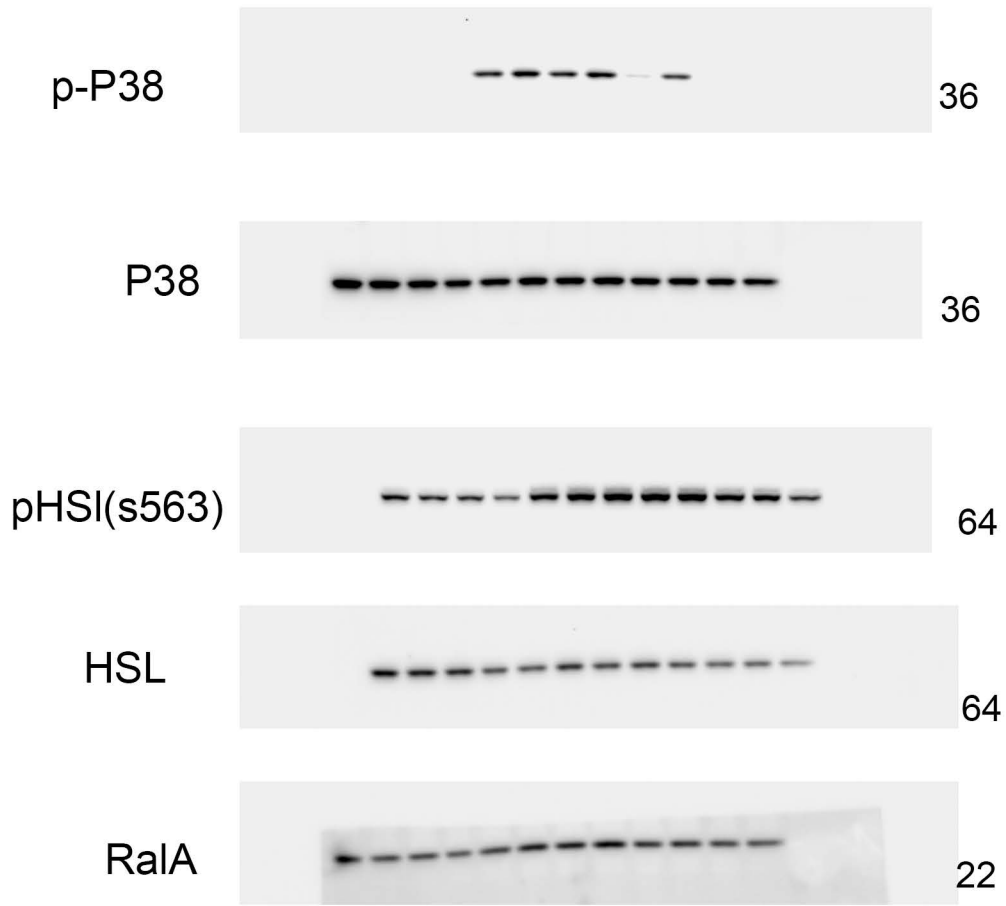

Fig 4G

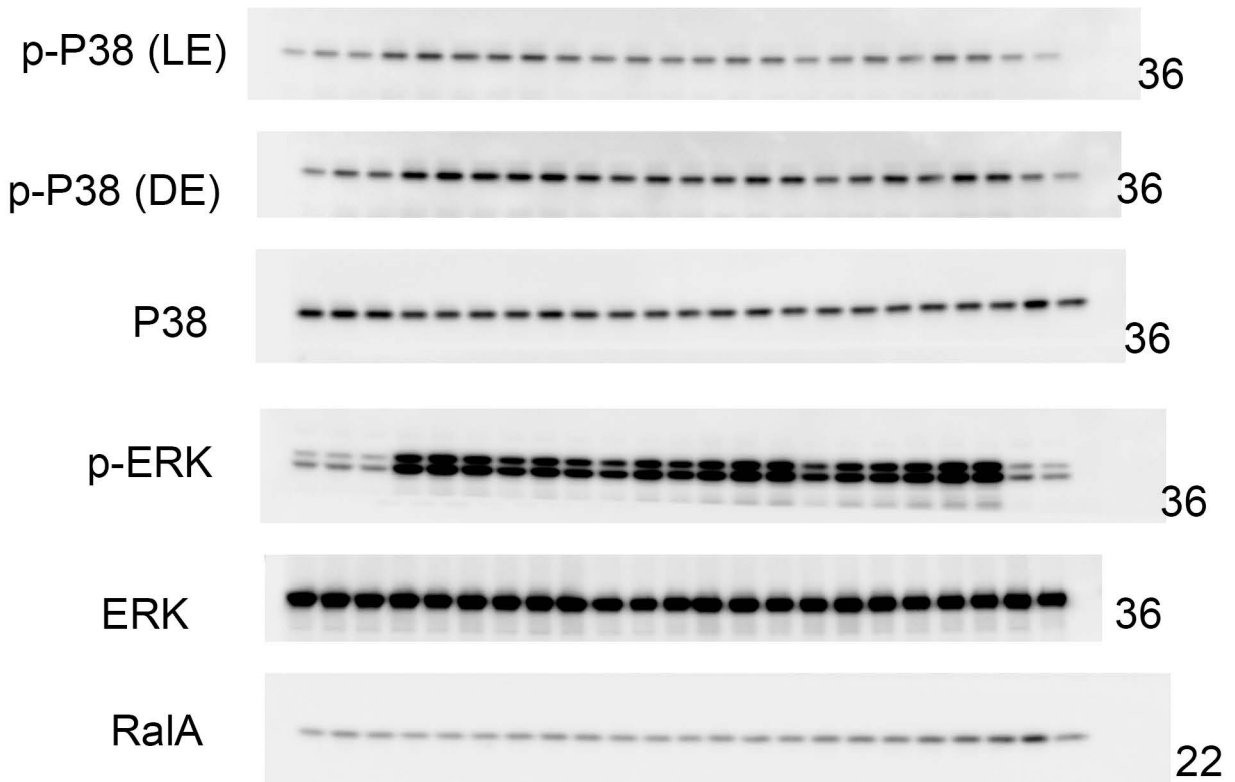

Fig 6G

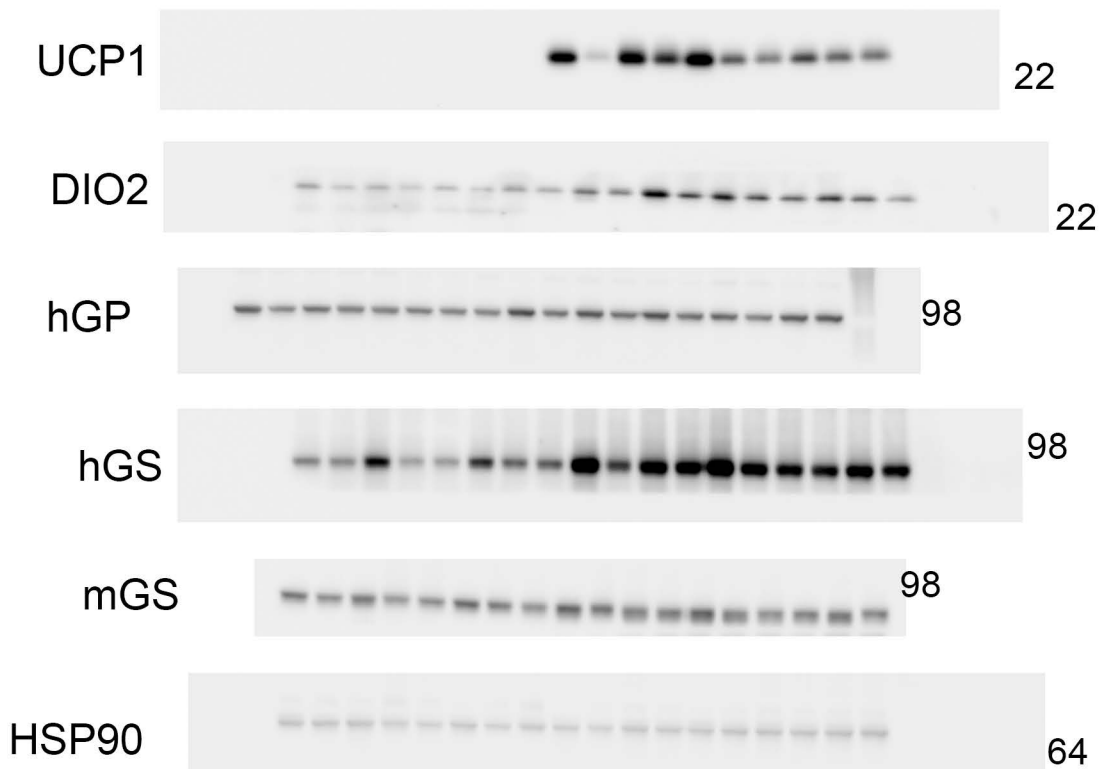

Extended data 1D

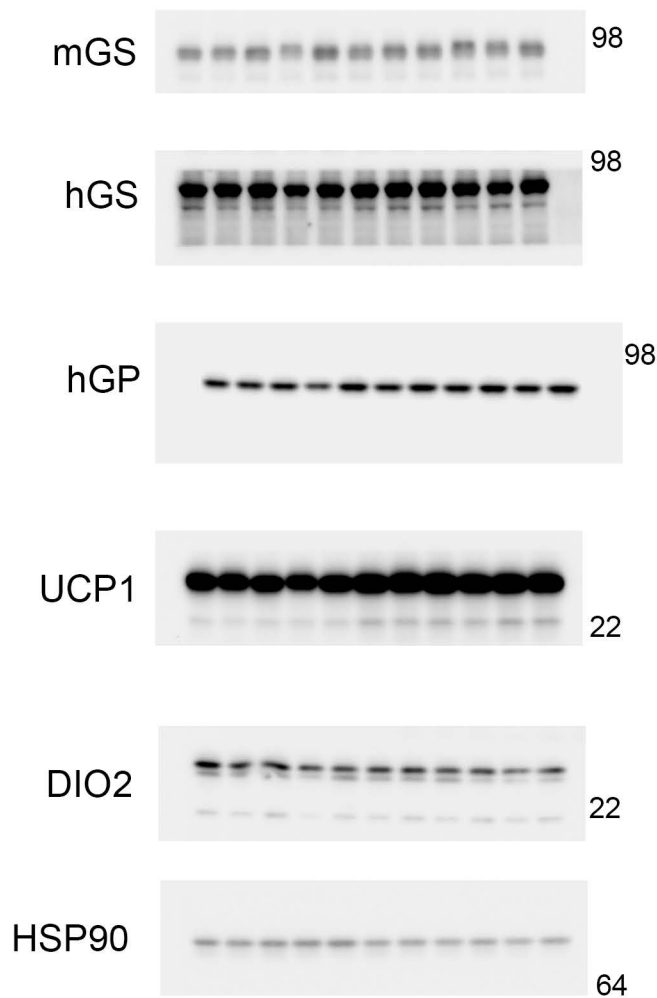

### Extended data 4C

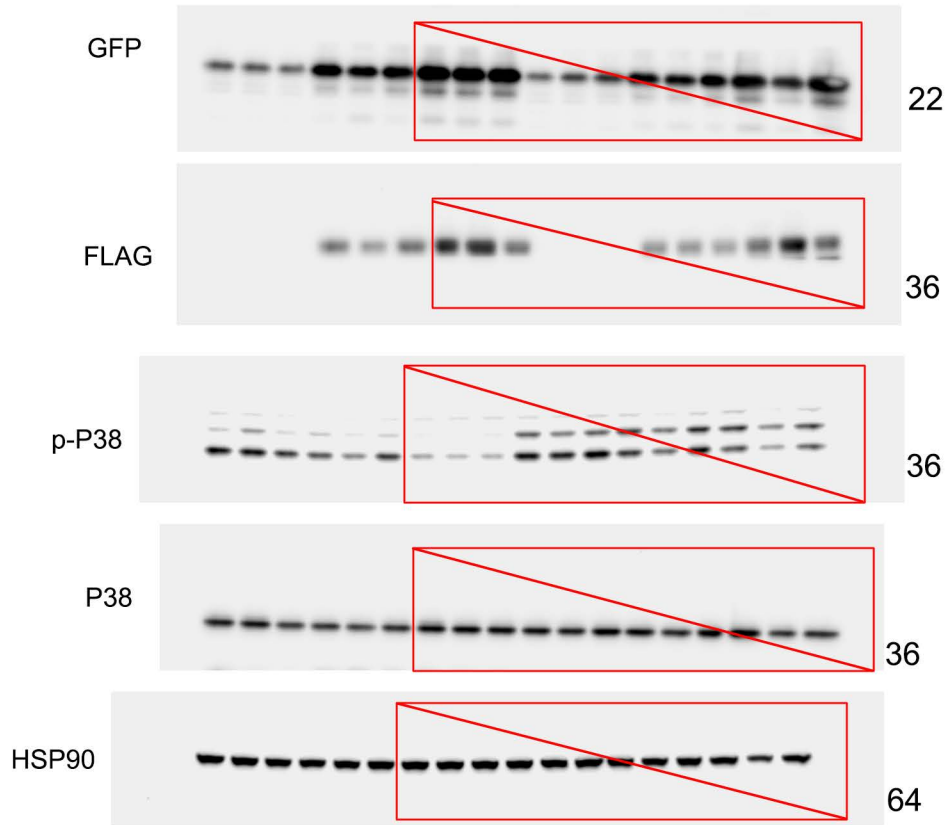

### Extended data 4D

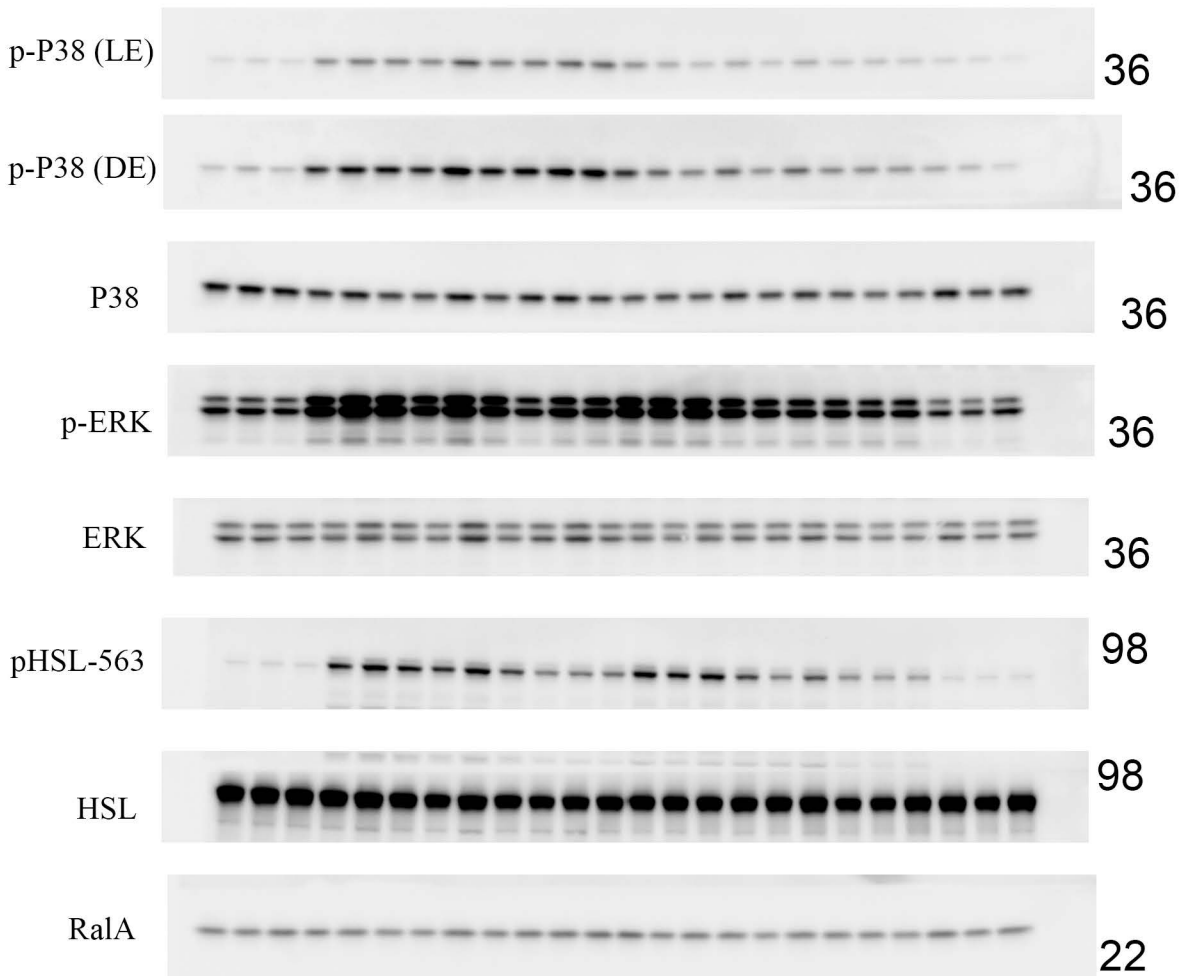

Extended data 6B

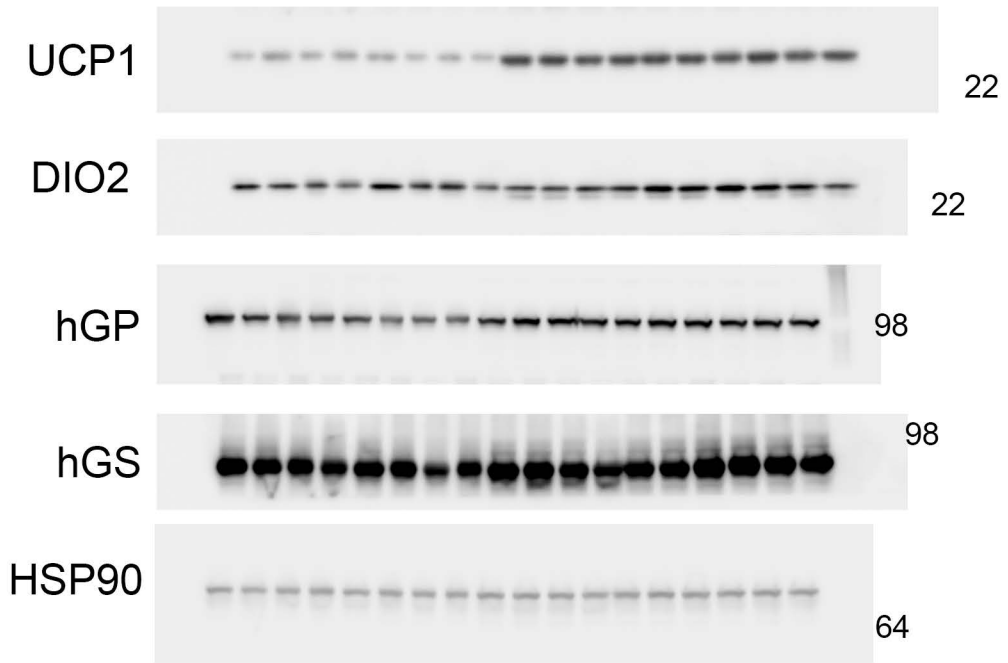

Supplement: NIHMS1804262-supplement-Keinan-Supplementary_Figures.pdf [file NIHMS1804262-supplement-Keinan-Supplementary_Figures.pdf]
