# Supplementary material
Source: PubMed Central journal article supplement (PMC9186421)
Supplement: NIHMS1804262-supplement-Keinan-Supplementary_Table.pdf [file NIHMS1804262-supplement-Keinan-Supplementary_Table.pdf]

## qPCR primers used in the study

| Gene    | Forward                     | Reverse                   |
|---------|-----------------------------|---------------------------|
| Ppp1R3C | TGATCCATGTGCTAGATCCACG      | ACTCTGCGATTTGGCTTCCTG     |
| ARBP    | CACTGGTCTAGGACCCGAGAA       | AGGGGGAGATGTTTCAGCATGT    |
| UCP1    | AGGCTTCCAGTACCATTAGGT       | CTGAGTGAGGCAAAGCTGATTTFG  |
| Dio2    | AATTATGCCTCGGAGAAGACCG      | GGCAGTTGCCTAGTGAAAGGT     |
| Gys1    | ATCTACACTGTGCTGCAGACG       | CCTTGCTGTTCATGGAATCC      |
| Gys2    | CCATCCTCAGCACCATTAGAC       | GTGACAACCTCGGACAAACTC     |
| Pygl    | TGCTTTGGATAAGAAGGGGTATGAGGC | TTGAAGAGGTCTGGCTGATTGGGAG |
| Pygm    | ATCAACCCCAACTCGCTCTTT       | GCTCCCTTTTGATGCGGTT       |
| Cidea   | ATCACAACCTGGCCTGGTTACG      | TACTACCCGGTGTCCATTTCT     |
| Pygb    | CAGCAGCATTACTATGAGCGG       | CCAAGTCCAACCCCAACTGA      |
| Gys1    | ATCTACACTGTGCTGCAGACG       | CCTTGCTGTTCATGGAATCC      |
| Gys2    | CCATCCTCAGCACCATTAGAC       | GTGACAACCTCGGACAAACTC     |
| NQO1    | AGGATGGGAGGTACTIONCGAATC    | AGGCGTCCTTCCTTATATGCTA    |
| GCLM    | AGGAGCTTCGGGACTGTATCC       | GGGACATGGTGCATTCCAAAA     |
| GPx     | AGTCCACCGTGTATGCCTTCT       | GAGACGCGACATTCTCAATGA     |
| SOD2    | CAGACCTGCCTTACGACTATGG      | CTCGGTGGCGTTGAGATTGTT     |
